# Supplementary figures and images for: PIF1 helicase promotes break‐induced replication in mammalian cells
Source: PubMed Central journal article supplement — EMBO J. 2021 Jan 20;40(8):e104509. doi: 10.15252/embj.2020104509 (PMC8047440; doi:10.15252/embj.2020104509), 2021-01-20

Fig 1D

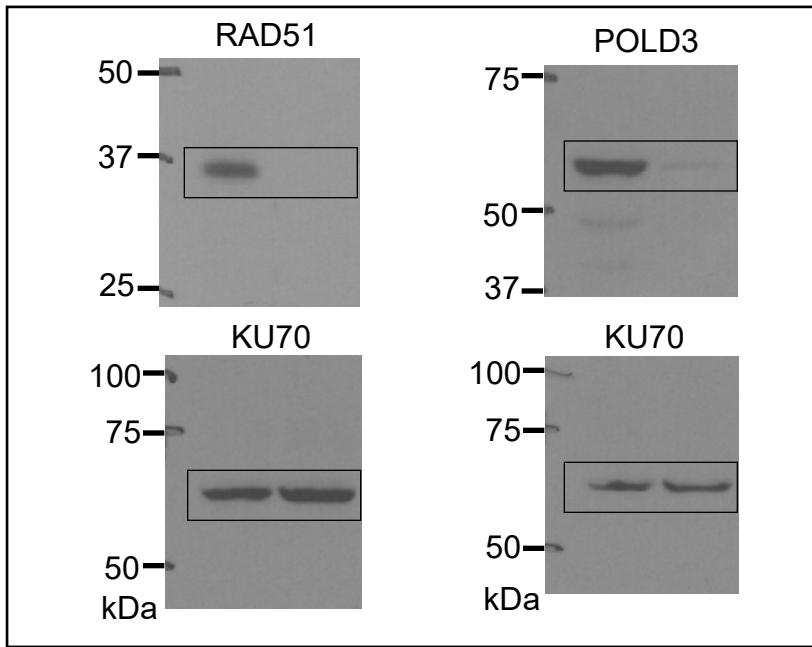

Fig 1E

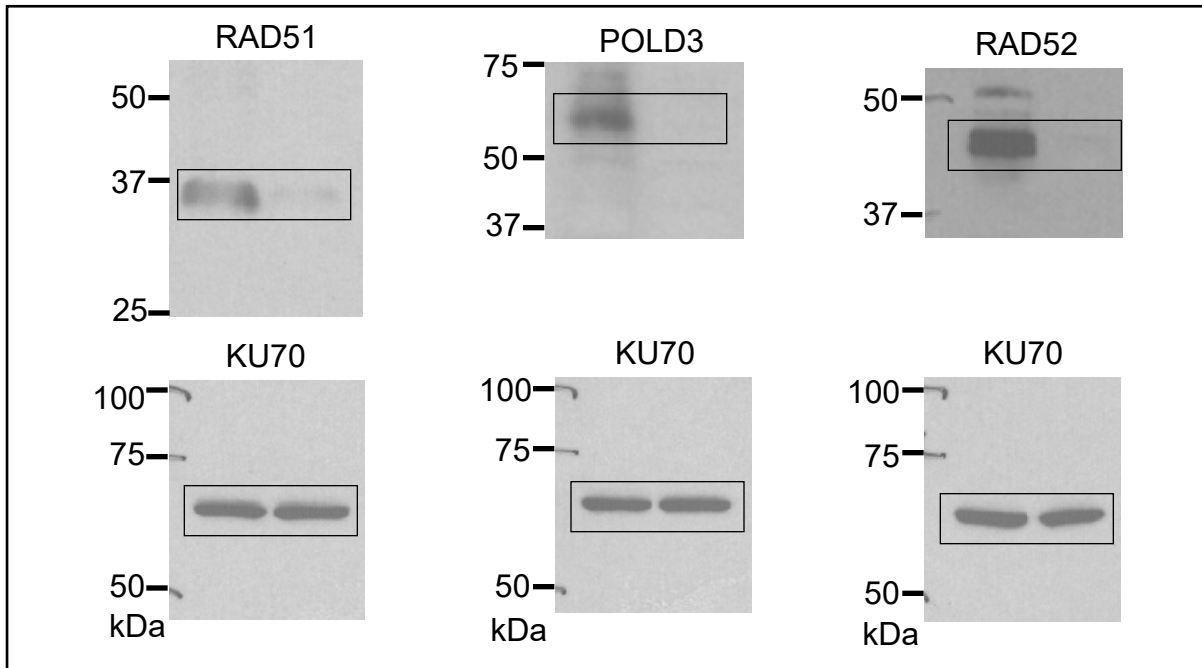

Fig 1H

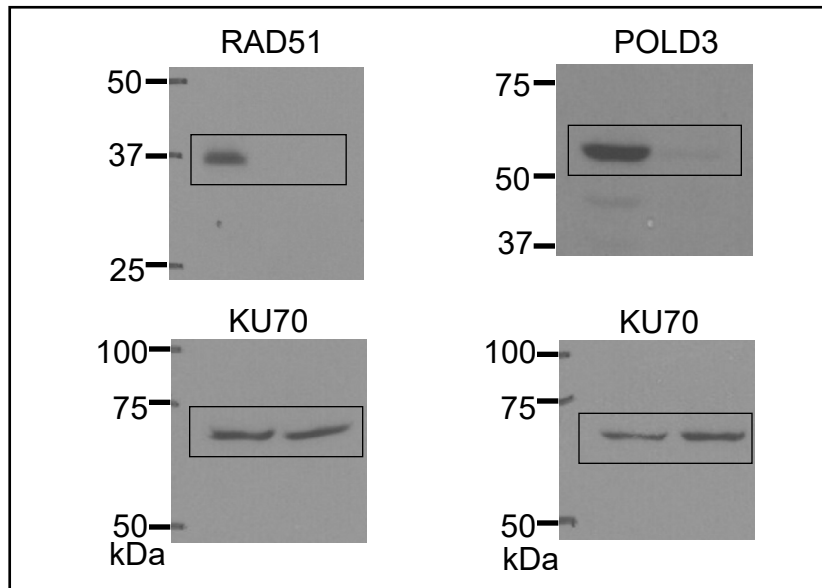

Supplement: EMBJ-40-e104509-s001.pdf [file EMBJ-40-e104509-s001.pdf]

Fig S2C

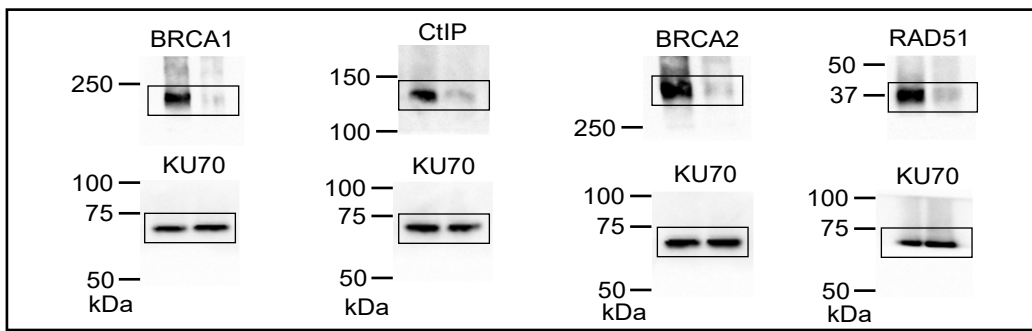

Fig S2D

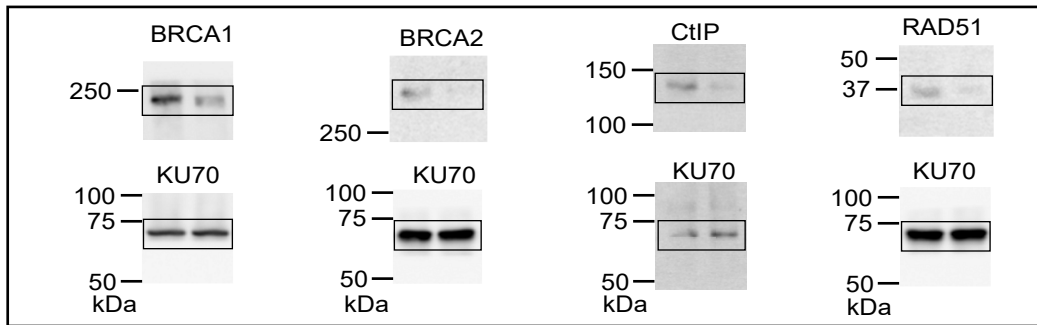

Fig S3C

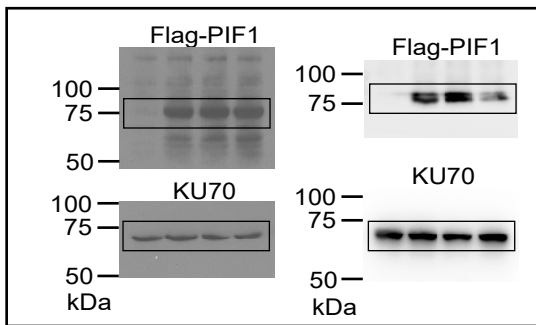

Fig S6B

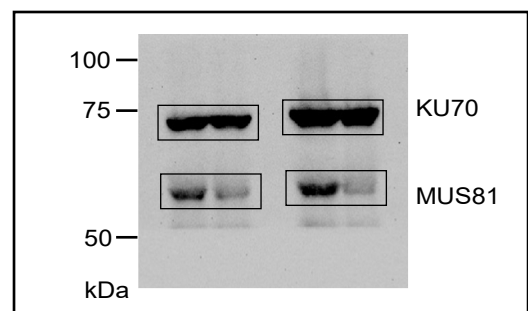

Fig S9A

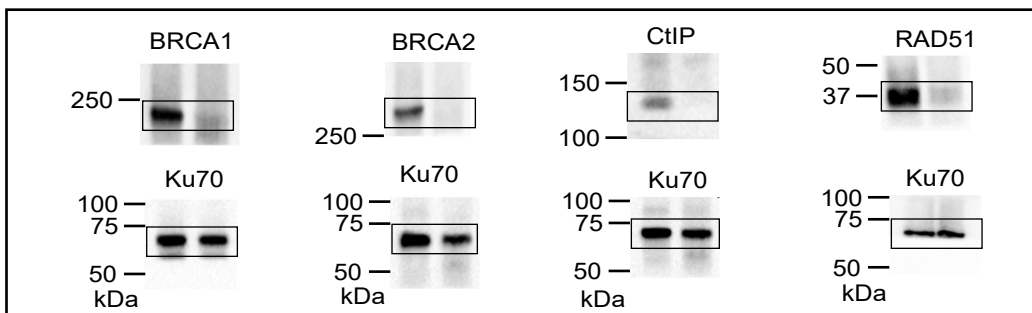

Fig S9B

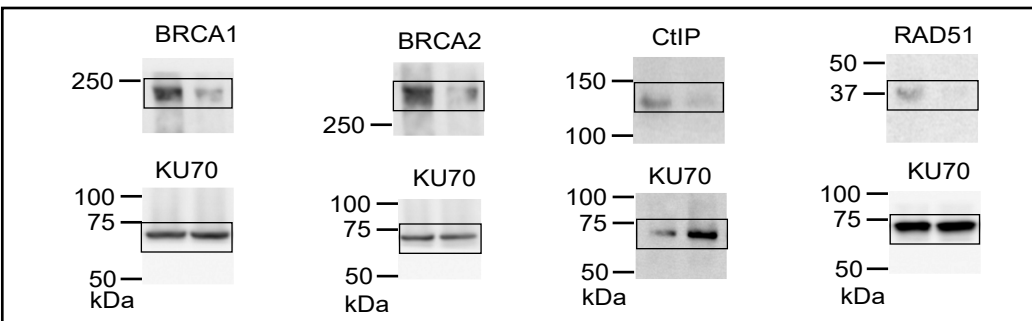

Fig S12A

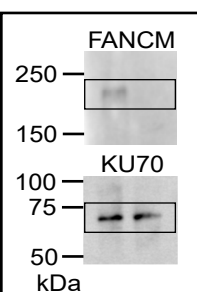

Fig S12B

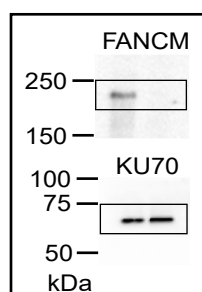

Fig S13

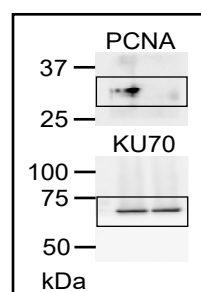

Supplement: EMBJ-40-e104509-s005.pdf [file EMBJ-40-e104509-s005.pdf]

Fig 4F

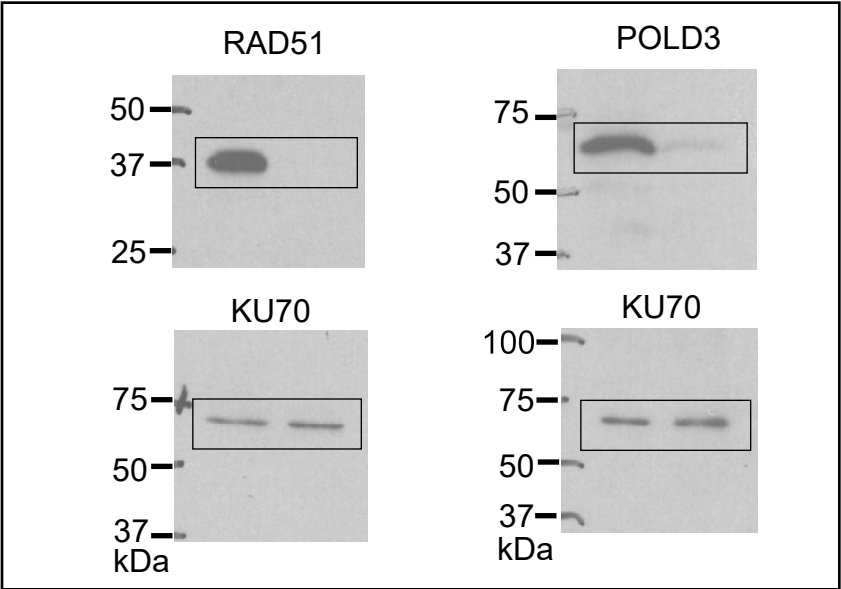

Supplement: EMBJ-40-e104509-s006.pdf [file EMBJ-40-e104509-s006.pdf]

Fig 3D

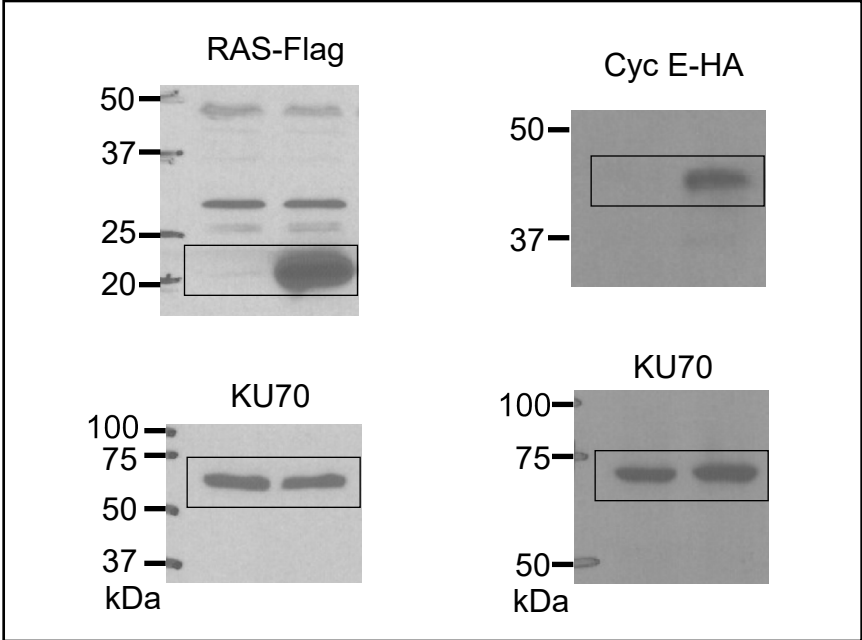

Fig 3E

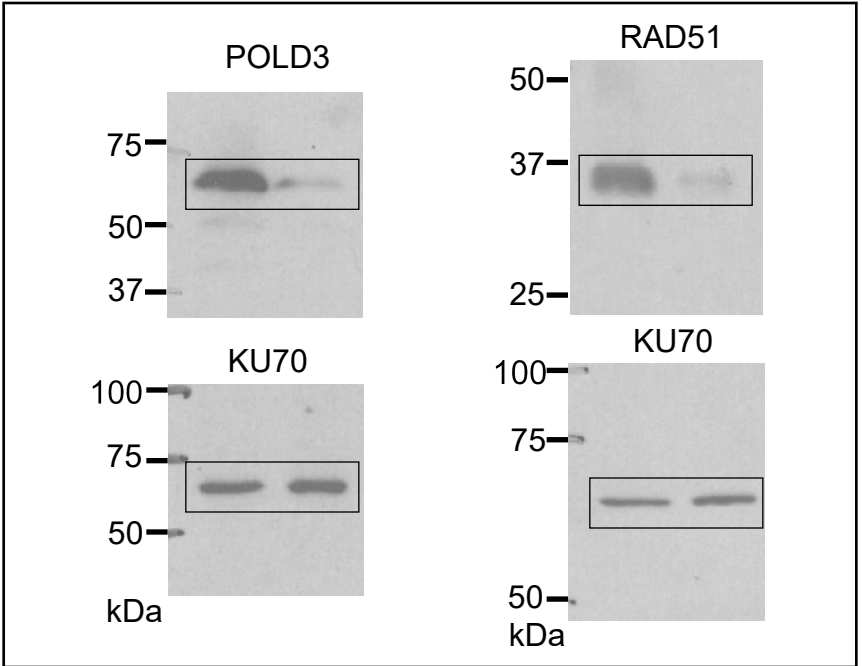

Supplement: EMBJ-40-e104509-s007.pdf [file EMBJ-40-e104509-s007.pdf]
